# Supplementary material
Source: PubMed Central journal article supplement (PMC4110062)

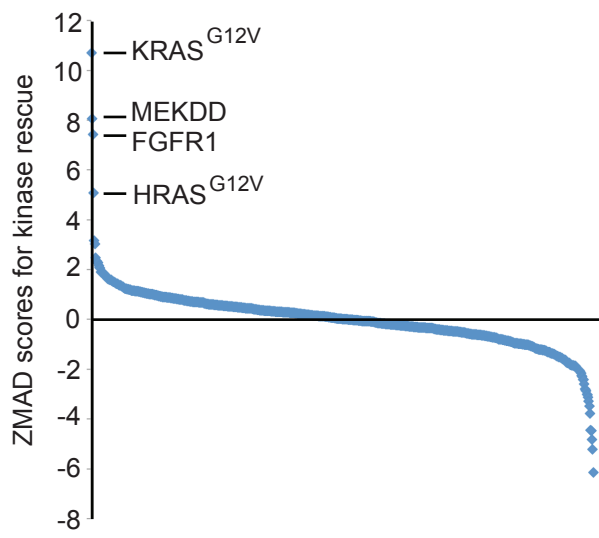

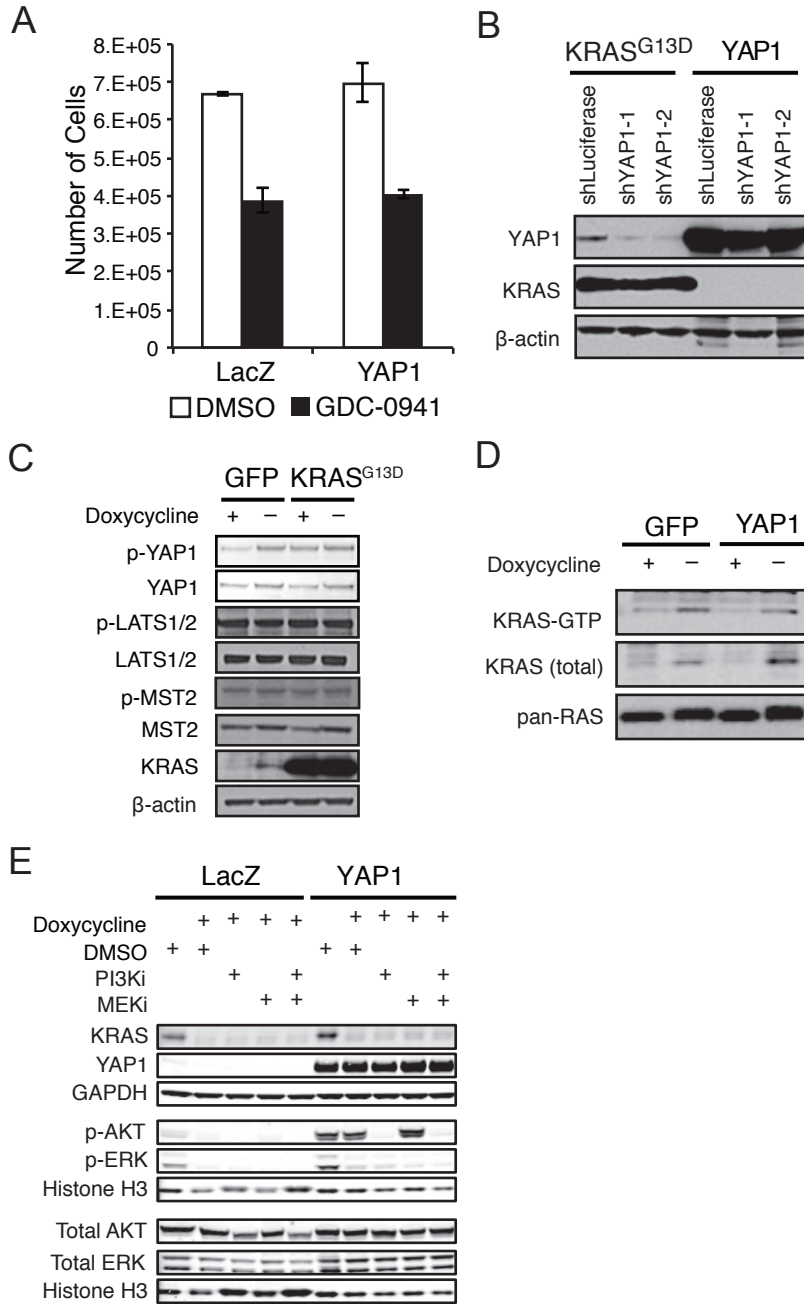

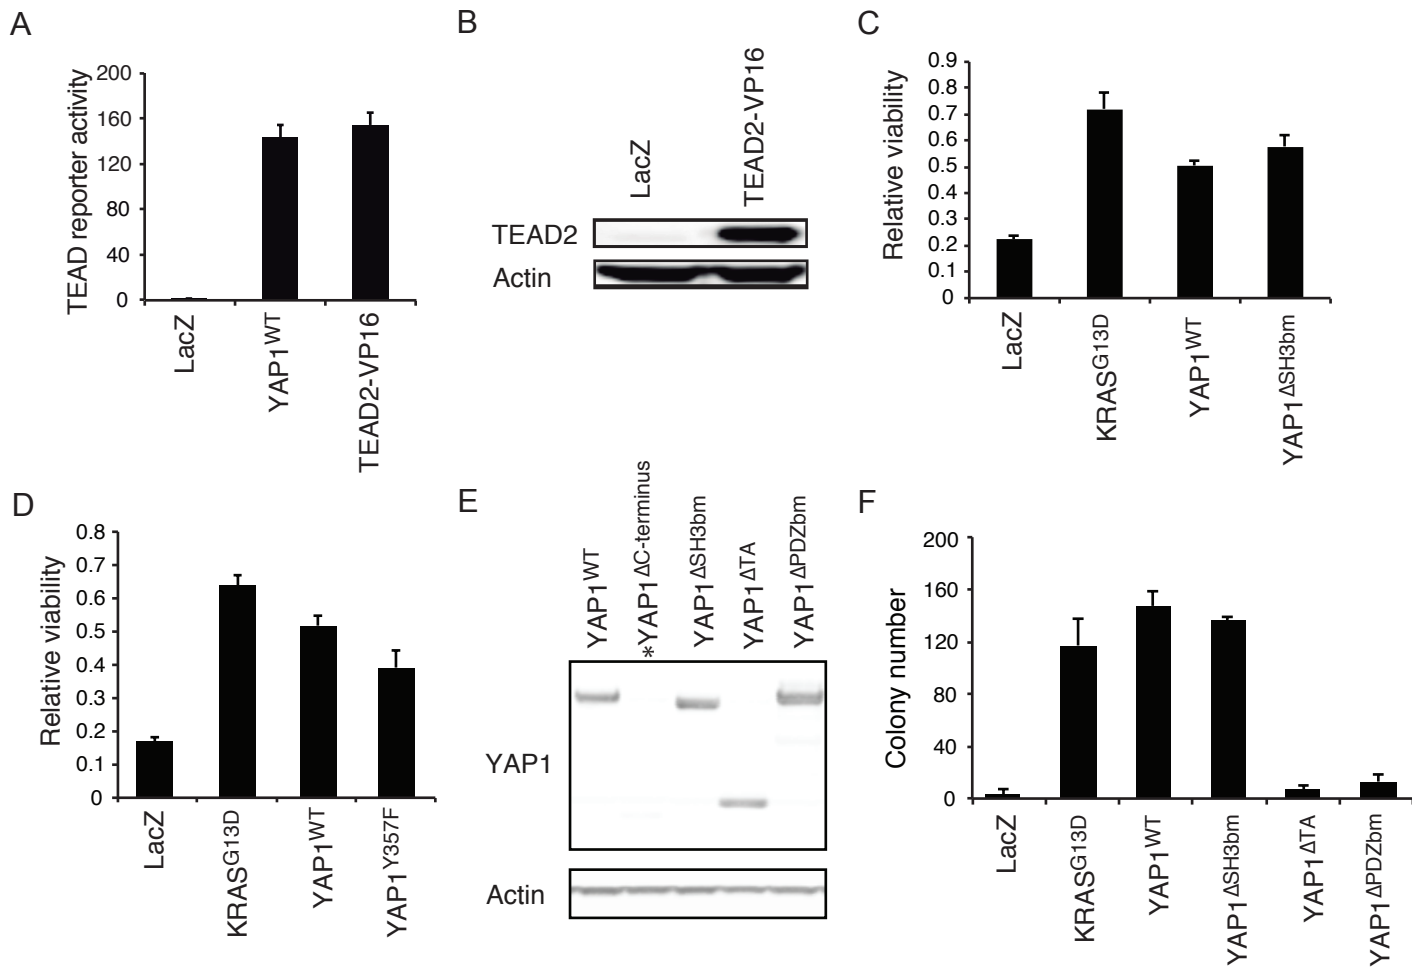

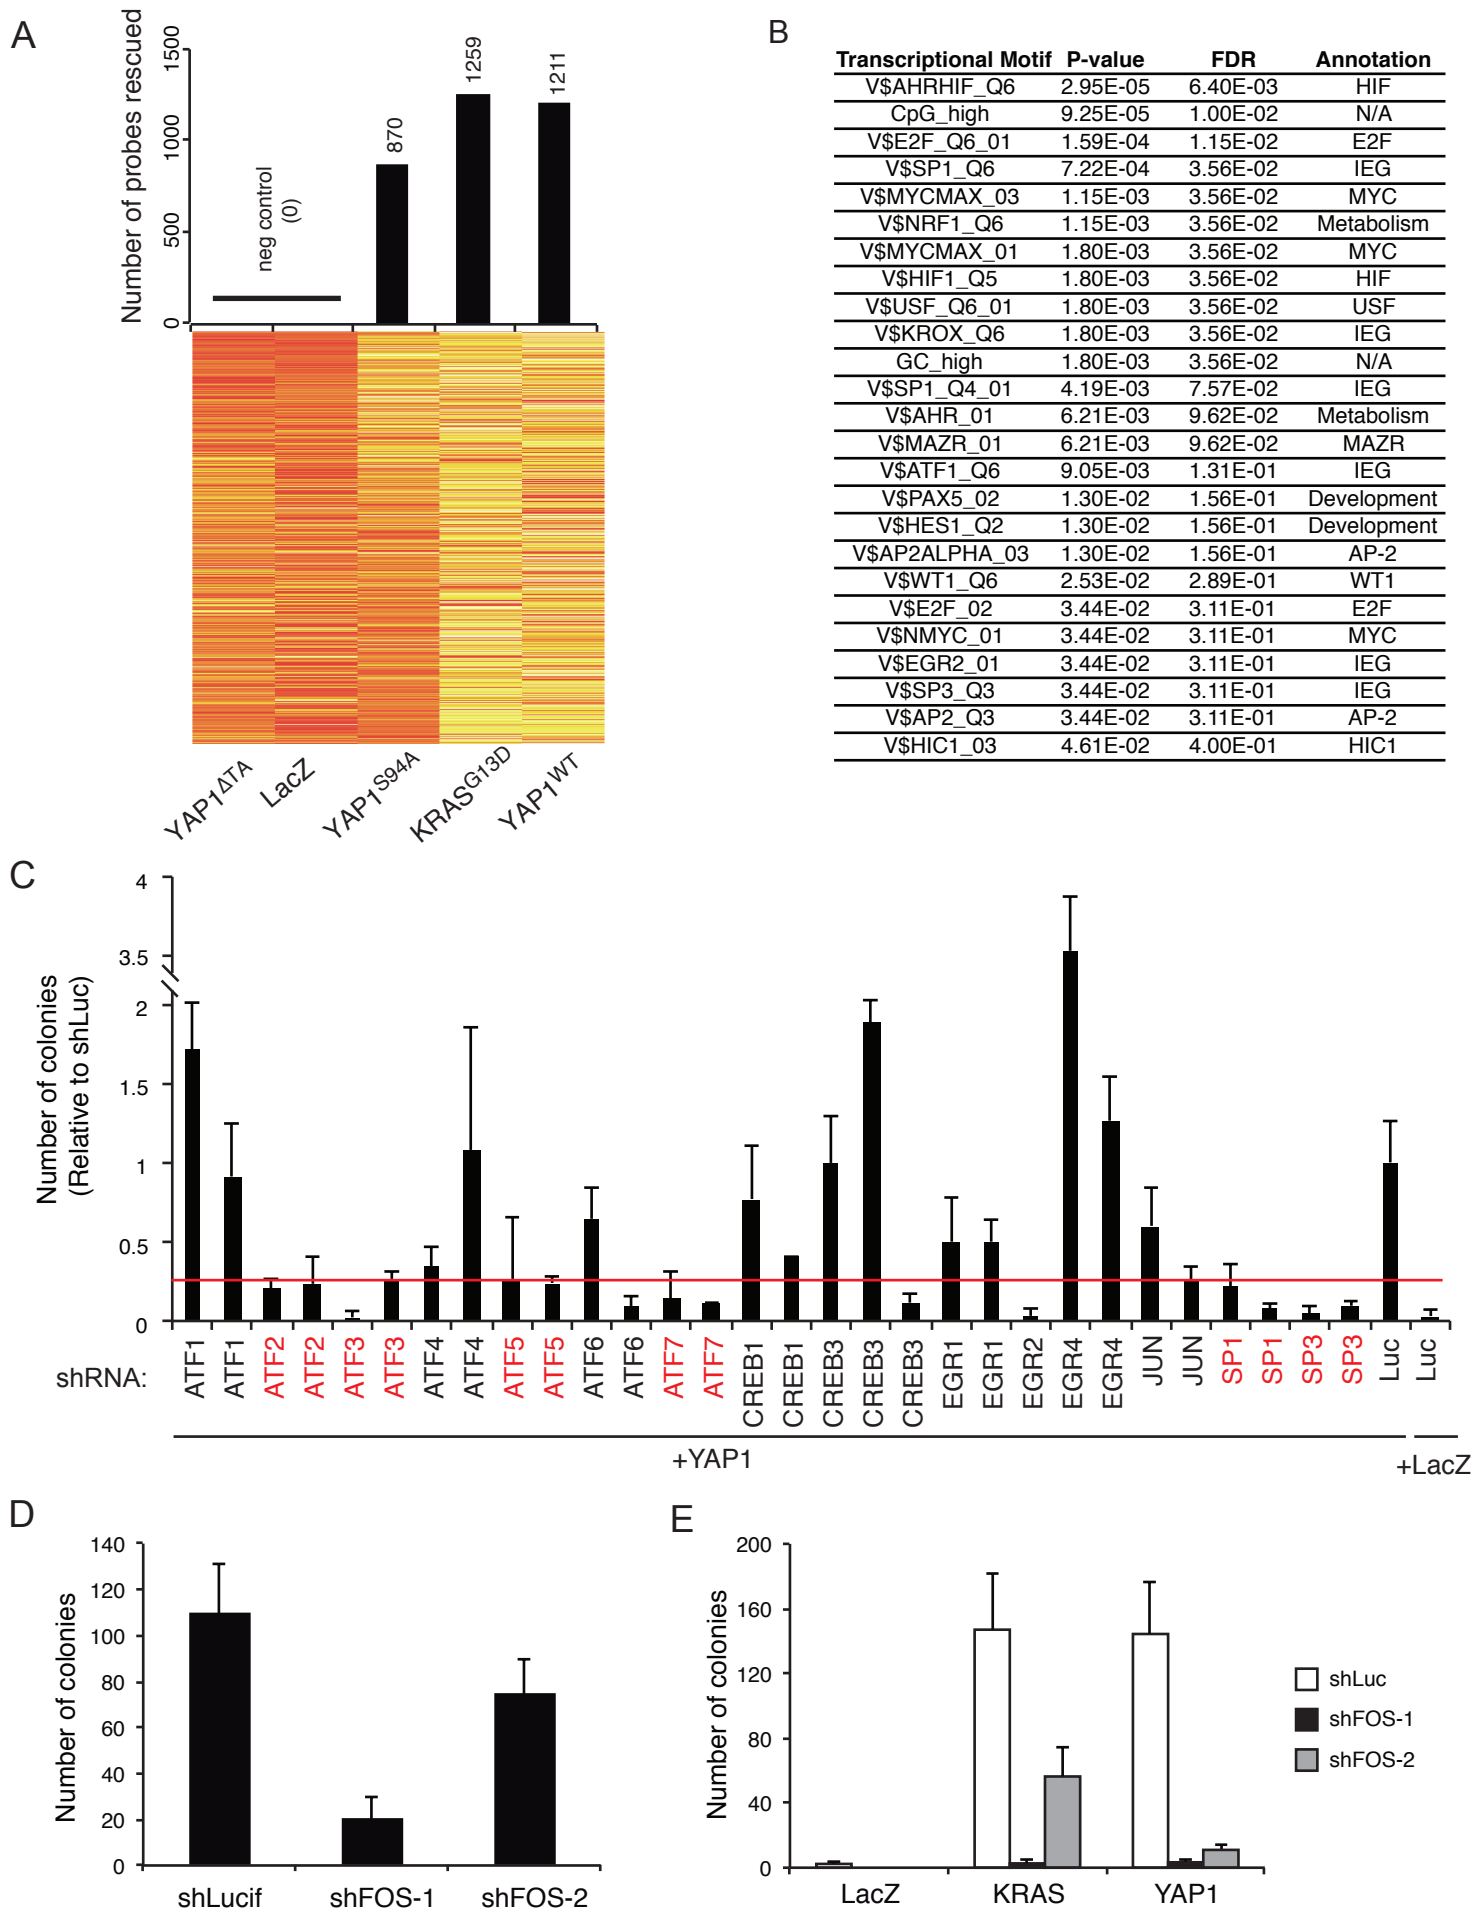

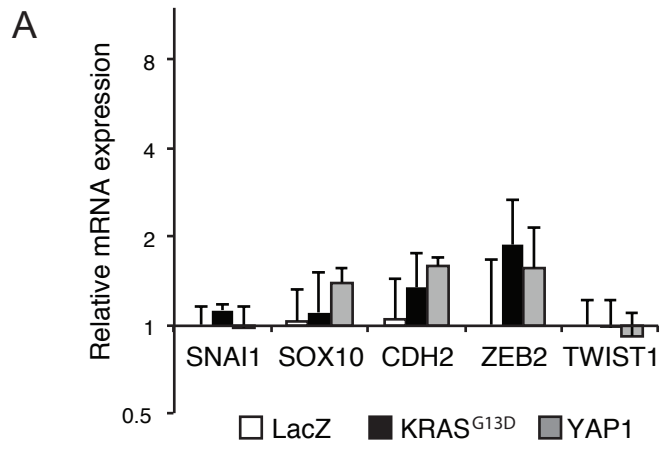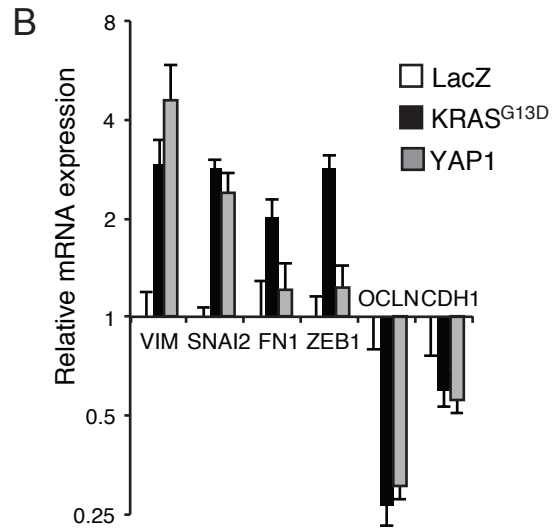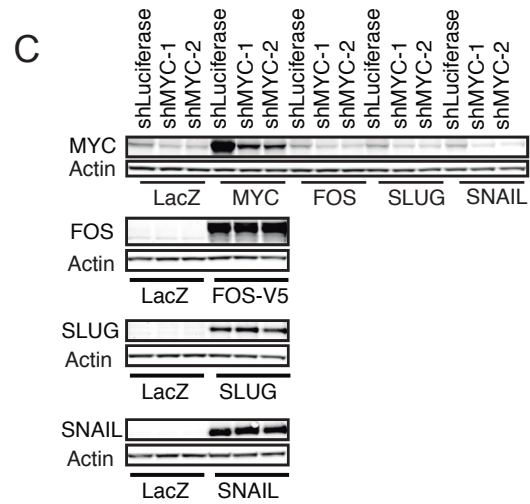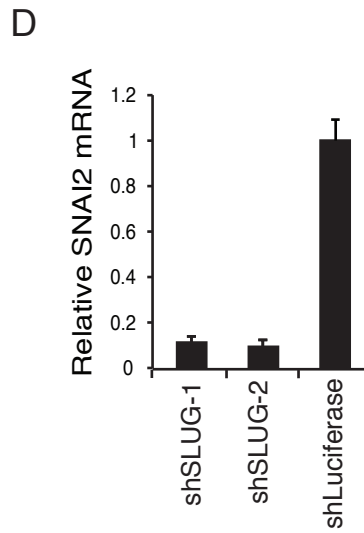

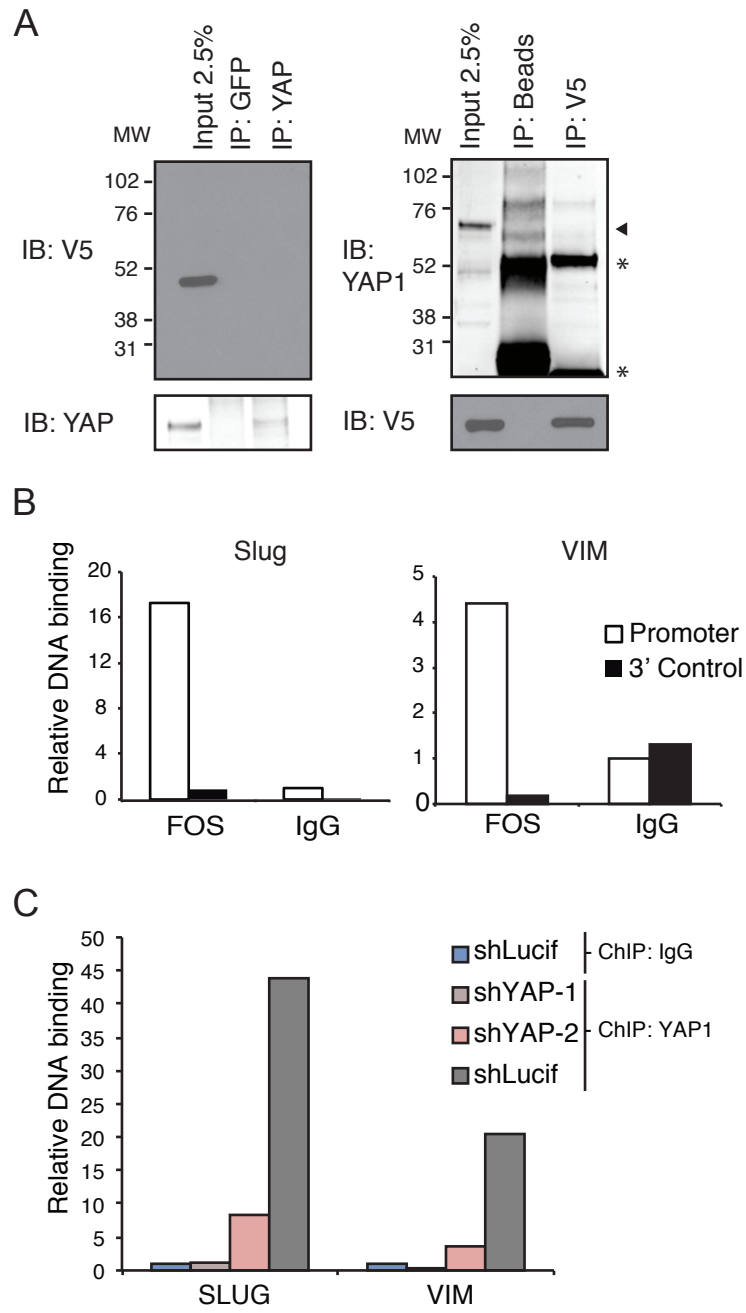

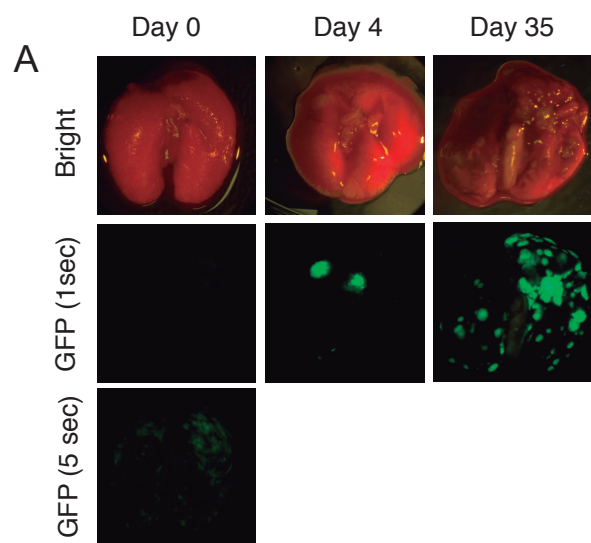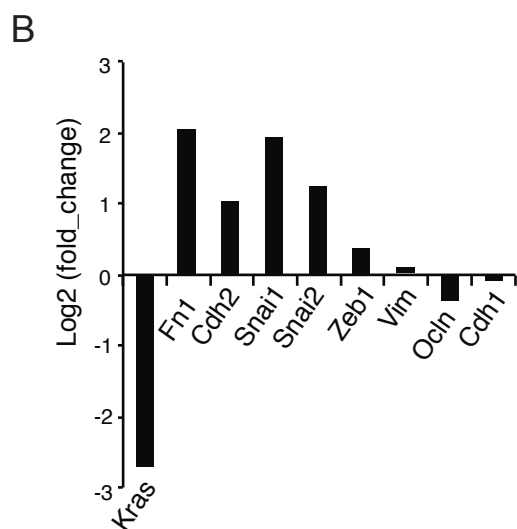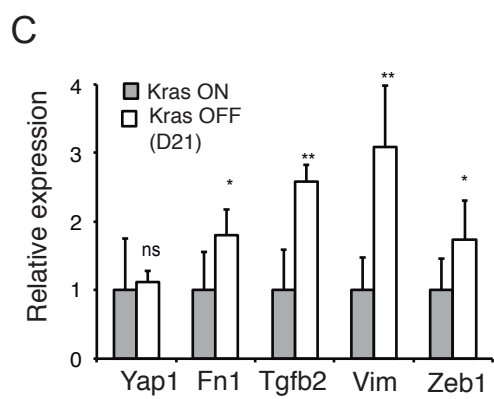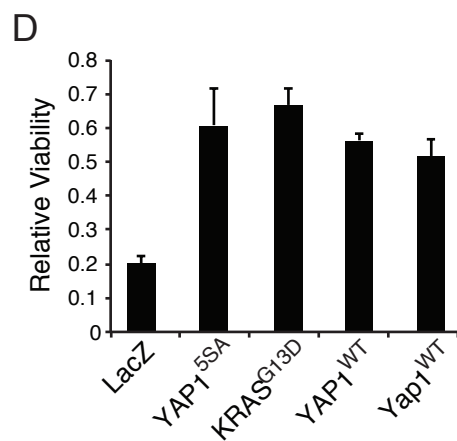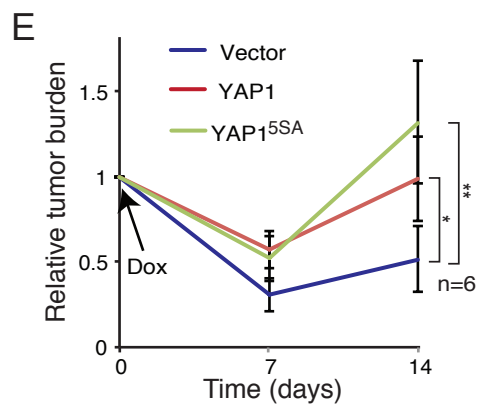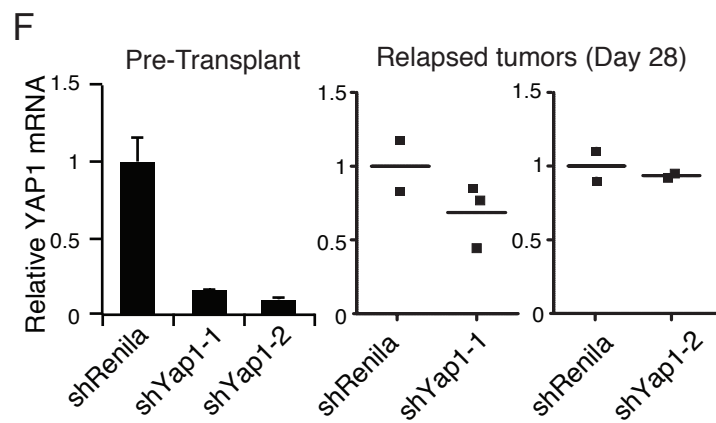

Supplement: NIHMS603891-supplement-07.pdf [file NIHMS603891-supplement-07.pdf]
